# Supplementary figures and images for: The Landscape of Expressed Chimeric Transcripts in the Blood of Severe COVID-19 Infected Patients
Source: MDPI journal article supplement (doi:10.3390/v15020433), 2023-02-04

BI042859 (RHOG-PGAP2)

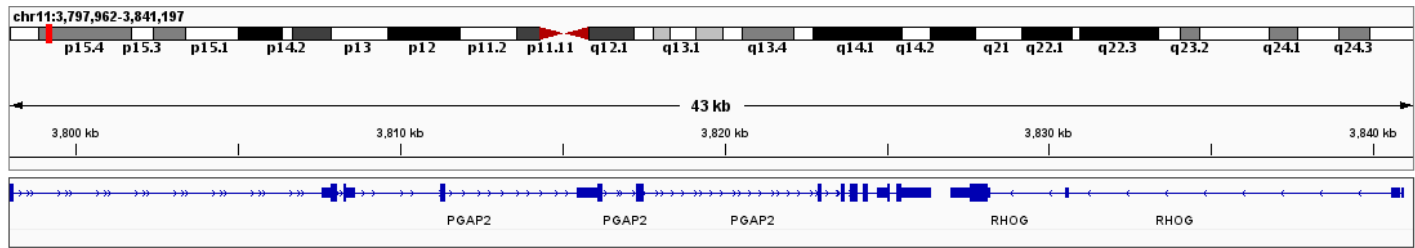

DA983067 (HLX-AS1-HLX)

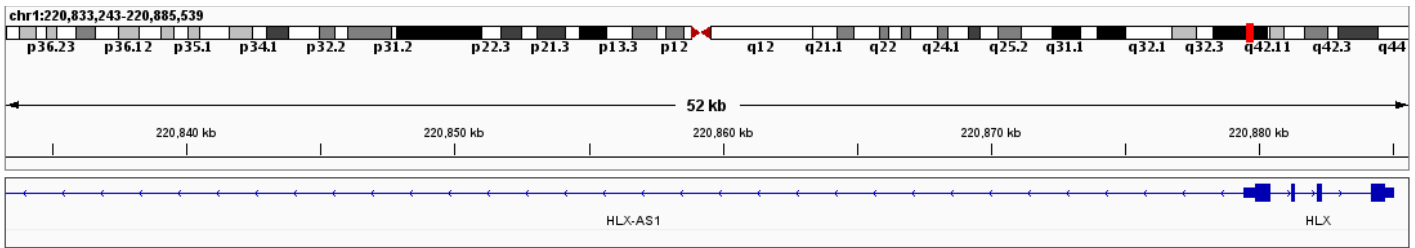

DB508702 (STAT1-GLS)

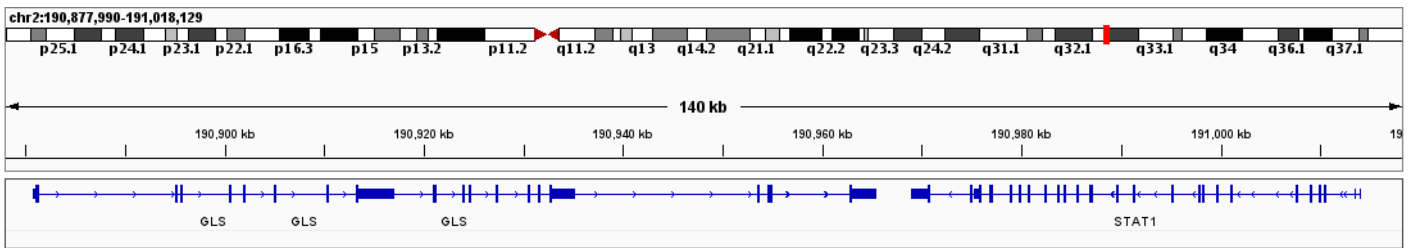

FY211079:RNF185-LIMK2

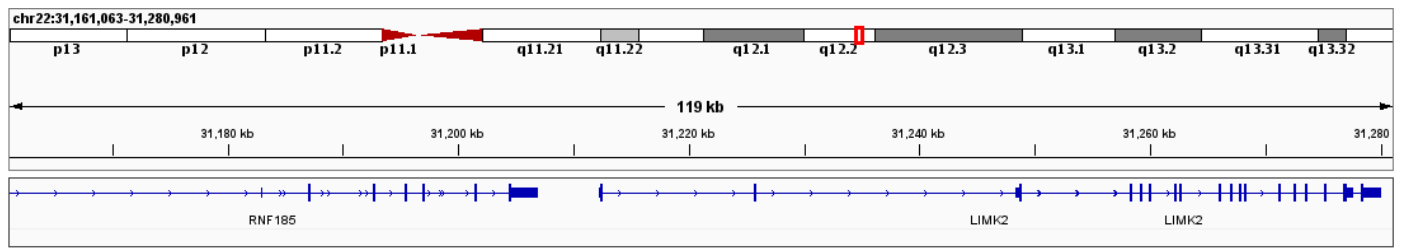

Supplement: s1 [file s1]
